# Supplementary material for: Hydrodistillation Extraction Kinetics Regression Models for Essential Oil Yield and Composition in Juniperus virginiana, J. excelsa, and J. sabina
Source: PubMed Central journal article supplement (PMC6429388; doi:10.3390/molecules24050986), 2019-03-11
Supplement: molecules-24-00986-s001.pdf [file molecules-24-00986-s001.pdf]

Supplemental material for:

## Hydrodistillation extraction kinetics regression models for essential oil yield and composition in *Juniperus virginiana*, *J. excelsa*, and *J. sabina*

Ivanka B. Semerdjieva <sup>1</sup>, Santosh Shiwakoti <sup>2</sup>, Charles L. Cantrell <sup>3</sup>, Valtcho D. Zheljazkov <sup>2,\*</sup>, Tess Astatkie <sup>4</sup>, Vicki Schlegel <sup>5</sup>, Tzenka Radoukova <sup>6</sup>

<sup>1</sup> Department of Botany and Agrometeorology, Agricultural University, Mendeleev 12, 4000 Plovdiv, Bulgaria; v\_semerdjieva@abv.bg

<sup>2</sup> Crop and Soil Science Department, Oregon State University, 3050 SW Campus Way, 109 Crop Science Building, Corvallis, OR 97331, USA; santoshcwakoti@gmail.com (S.H.); Valtcho.jeliazkov@oregonstate.edu (V.D.Z.)

<sup>3</sup> National Center for Natural Products Research, Agricultural Research Service, United States Department of Agriculture, University, MS 38677, USA; clcantr1@olemiss.edu

<sup>4</sup> Faculty of Agriculture, Dalhousie University, PO Box 550, Truro, NS B2N 5E3, Canada; astatkie@dal.ca

<sup>5</sup> Department of Food Science and Technology, University of Nebraska – Lincoln, 327 Food Technology Complex, Lincoln, NE 68583, USA; vschlegel3@unl.edu

<sup>6</sup> Department of Botany and Methods of Biology Teaching, Faculty of Biology, University of Plovdiv “Paisii Hilendarski”, 24 Tzar Assen, 4000 Plovdiv, Bulgaria; [kiprei@abv.bg](mailto:kiprei@abv.bg)

\* Correspondence: Valtcho.jeliazkov@oregonstate.edu

**Supplemental Table 1.** Observed and reported retention index values for compounds identified by Kovat analysis only.

| Compound           | Observed RI | Calculated RI | Identification Methods |
|--------------------|-------------|---------------|------------------------|
| pregeijerene B     | KI = 1276   | RI = 1277.56  | RI, Kovat              |
| $\alpha$ -thujene  | KI = 930    | RI = 928.52   | RI, Kovat, NIST        |
| $\delta$ -cadinene | KI = 1523   | RI = 1523.61  | RI, Kovat, NIST        |
| elemol             | KI = 1550   | RI = 1554.91  | RI, Kovat, NIST        |
| elemicin           | KI = 1557   | RI = 1553.35  | RI, Kovat, NIST        |
|                    |             |               |                        |

$\alpha$ -Thujene

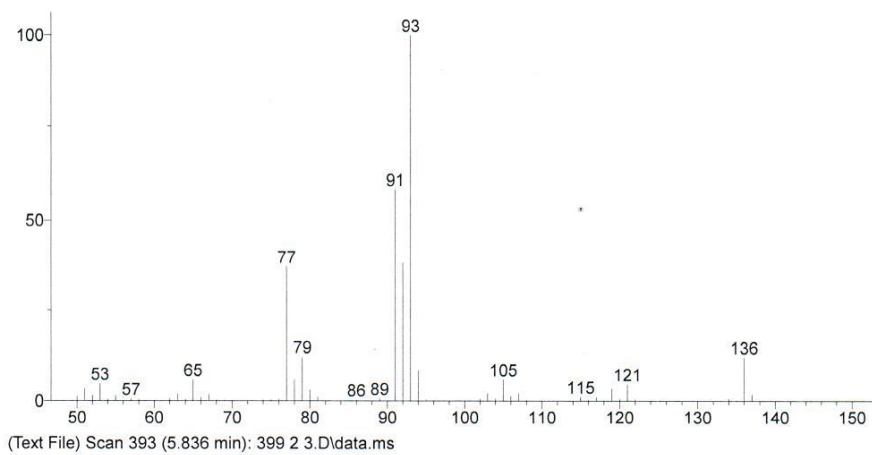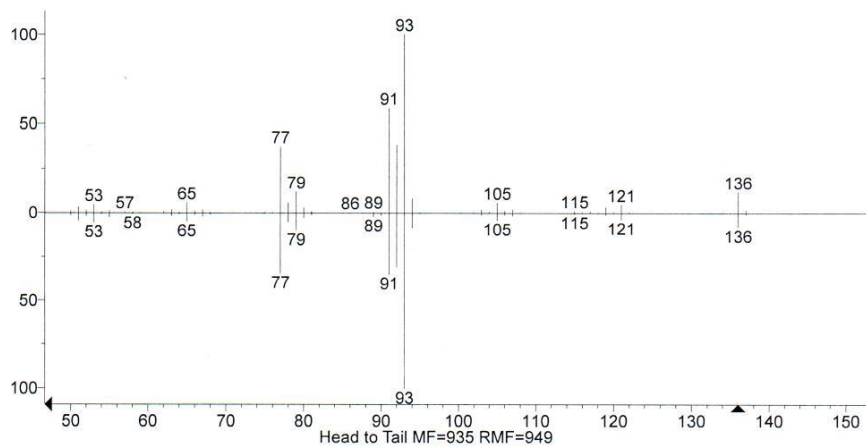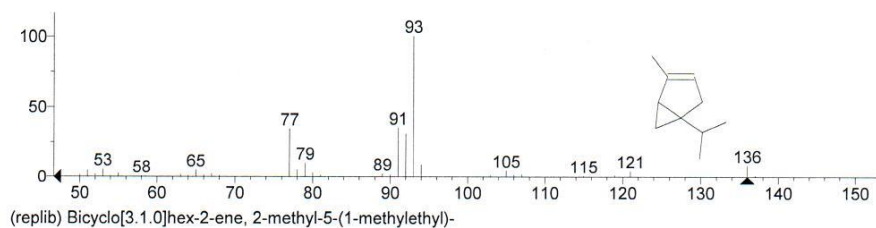

**Supplemental Figure 1.** Comparison of actual mass spectrum for  $\alpha$ -thujene and NIST database mass spectrum.

Cadinene<delta>

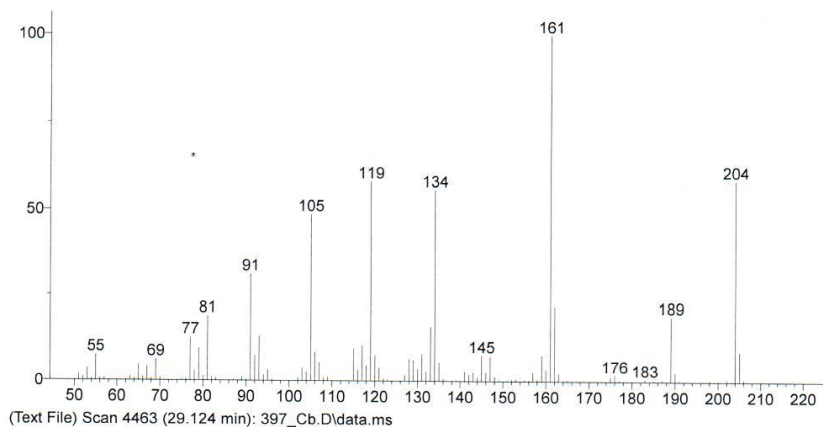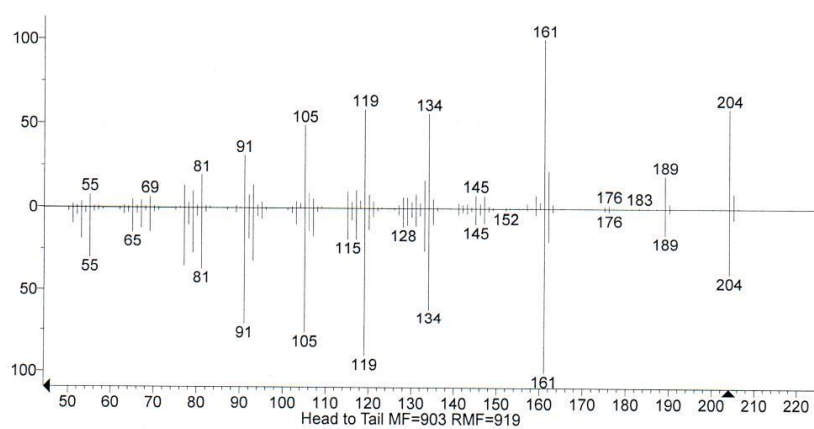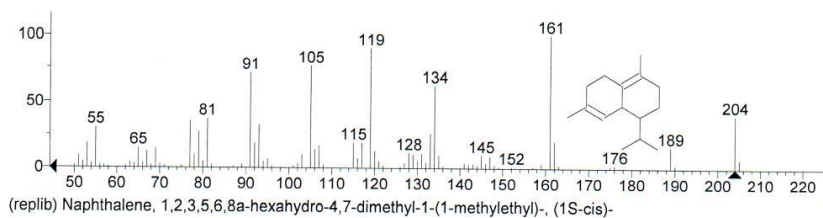

**Supplemental Figure 2.** Comparison of actual mass spectrum for  $\delta$ -cadinene and NIST database mass spectrum.

Elemol

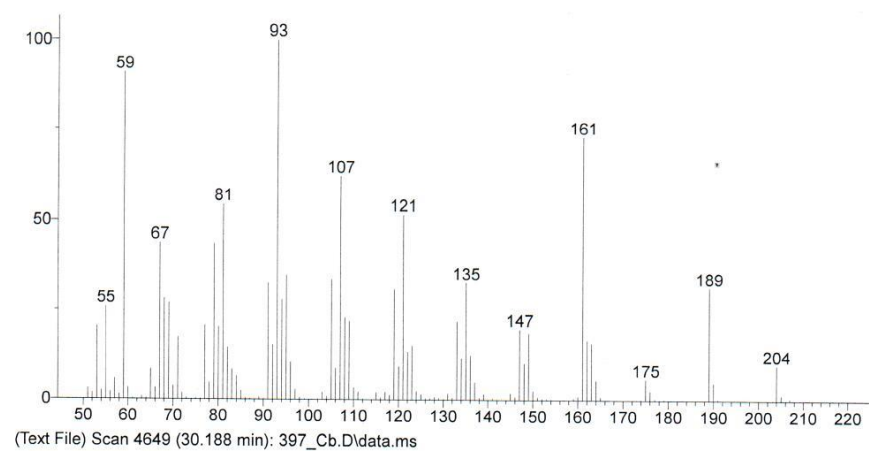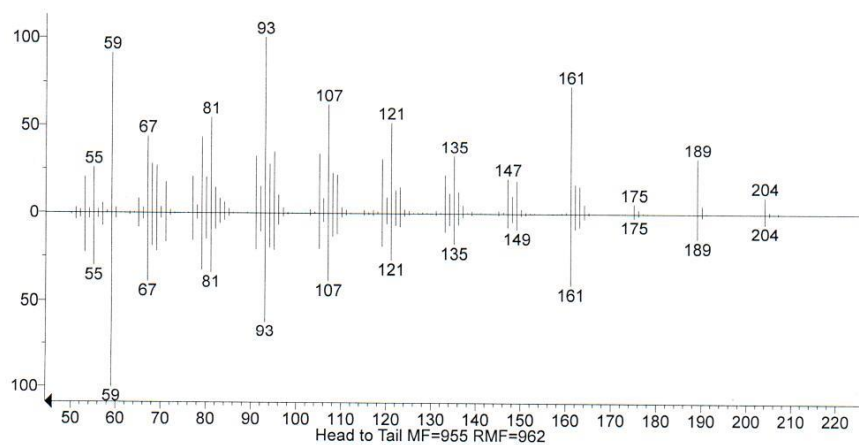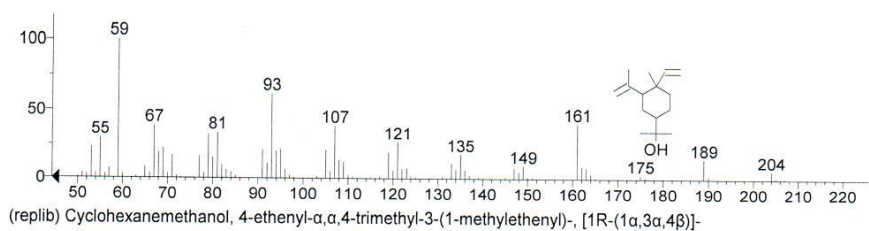

**Supplemental Figure 3.** Comparison of actual mass spectrum for elemol and NIST database mass spectrum.

Elemicin

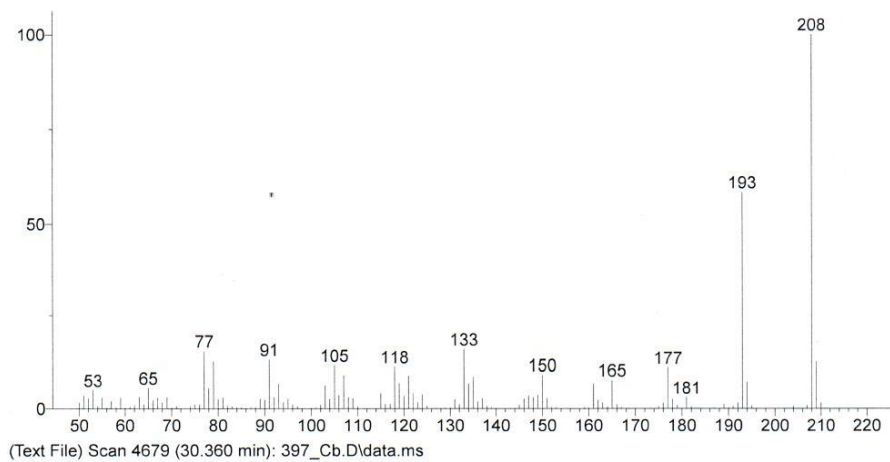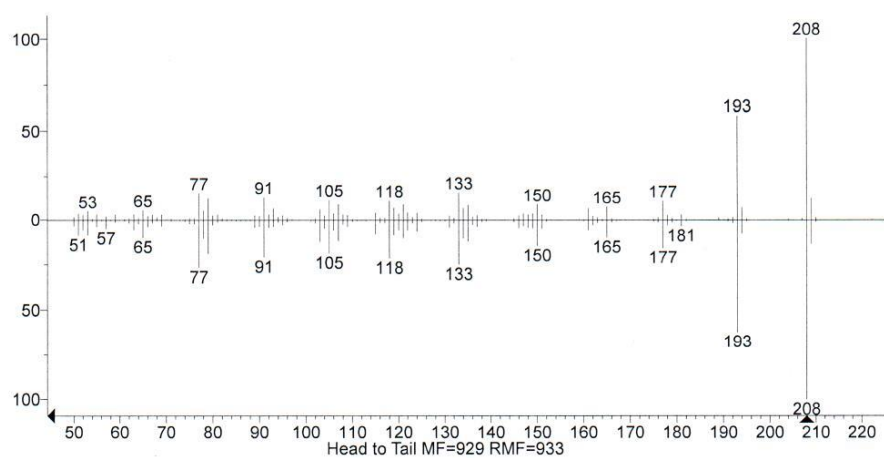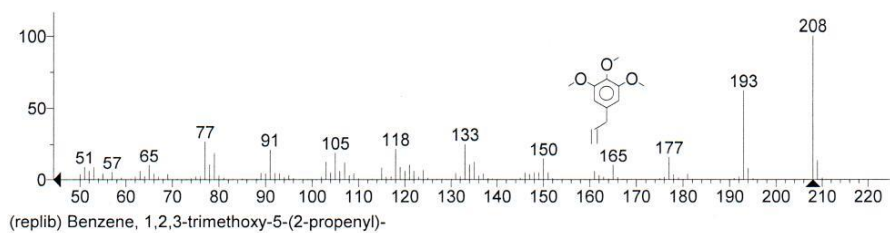

**Supplemental Figure 4.** Comparison of actual mass spectrum for elemicin and NIST database mass spectrum.

File : C:\msdchem\1\data\Valcho\_2015\JuniperusVirginianus\_180308\3  
 ... 97\_Cb.D  
 Operator : SG3  
 Instrument : USDA 5975  
 Acquired : 8 Mar 2018 16:43 using AcqMethod USDA KOVAT.M  
 Sample Name: 397\_Cb  
 Misc Info :

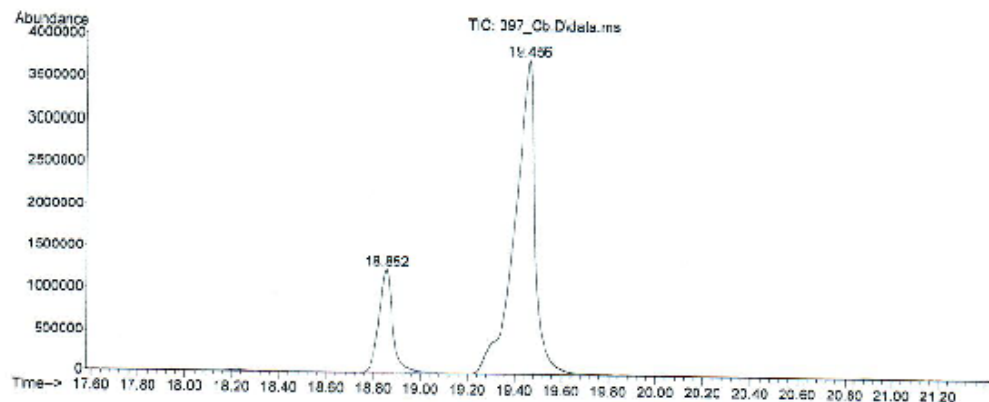

RT: 19.05 AI: 1274 KI: 1276 Pregeijerene B  
 CAS#: 556799-96-3 MF: C12H18 FW: 162 MSD LIB#: 1758  
 CN: 1,4,7-cyclooctatriene, 1,7-dimethyl-, (1E,4E,7E)-  
 Synonyms: erectopatene  
 Source: *Juniperus erectopatens* leaf oil, Cool & RP Adams, Phytochem. 63:105(2003)

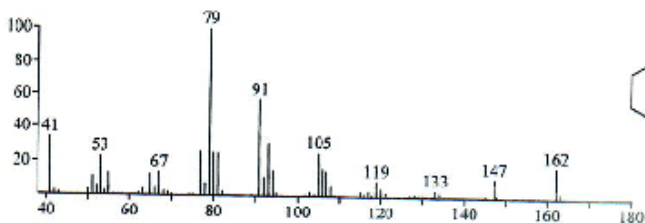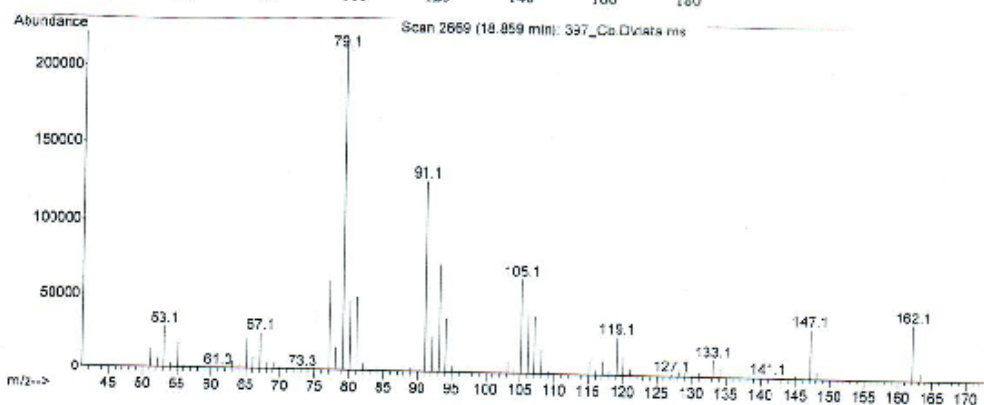

**Supplemental Figure 5.** Comparison of actual mass spectrum for pregeijerene B and Kovat reported mass spectrum.

**Distillation study with *Juniperus virginiana* from Bulgaria conducted on Jan 4, 2018**

| <b>Sample #</b> | <b>Timeframe, repliate</b> | <b>Species</b>              | <b>g oil</b> |
|-----------------|----------------------------|-----------------------------|--------------|
|                 | <i>0-5 min rep 1</i>       | <i>Juniperus virginiana</i> | 0.1195       |
|                 | <i>0-5min rep 2</i>        | <i>Juniperus virginiana</i> | 0.1056       |
|                 | <i>0-5min rep 3</i>        | <i>Juniperus virginiana</i> | 0.1330       |
|                 | <i>5-10min rep1</i>        | <i>Juniperus virginiana</i> | 0.0156       |
|                 | <i>5-10min rep2</i>        | <i>Juniperus virginiana</i> | 0.0490       |
|                 | <i>5-10 min rep 3</i>      | <i>Juniperus virginiana</i> | 0.1528       |
|                 | <i>10-20 min rep1</i>      | <i>Juniperus virginiana</i> | 0.0943       |
|                 | <i>10-20 min rep2</i>      | <i>Juniperus virginiana</i> | 0.0771       |
|                 | <i>10-20 min rep 3</i>     | <i>Juniperus virginiana</i> | 0.0280       |
|                 | <i>20-40 min rep 1</i>     | <i>Juniperus virginiana</i> | 0.1340       |
|                 | <i>20-40 min rep 2</i>     | <i>Juniperus virginiana</i> | 0.1523       |
|                 | <i>20-40 min rep 3</i>     | <i>Juniperus virginiana</i> | 0.1809       |
|                 | <i>40-80 min rep 1</i>     | <i>Juniperus virginiana</i> | 0.1714       |
|                 | <i>40-80 min rep 2</i>     | <i>Juniperus virginiana</i> | 0.2277       |
|                 | <i>40-80 min rep 3</i>     | <i>Juniperus virginiana</i> | 0.2130       |
|                 | <i>80-160 min rep 1</i>    | <i>Juniperus virginiana</i> | 0.1462       |
|                 | <i>80-160 min rep 2</i>    | <i>Juniperus virginiana</i> | 0.2412       |
|                 | <i>80-160 min rep 3</i>    | <i>Juniperus virginiana</i> | 0.0675       |
|                 | <i>160-240 min rep 1</i>   | <i>Juniperus virginiana</i> | 0.1006       |
|                 | <i>160-240 min rep 2</i>   | <i>Juniperus virginiana</i> | 0.0798       |
|                 | <i>160-240 min rep 3</i>   | <i>Juniperus virginiana</i> | 0.0586       |
|                 | <i>Controll 0-240 min</i>  | <i>Juniperus virginiana</i> | 1.1982       |
|                 | <i>Control 0-240 min</i>   | <i>Juniperus virginiana</i> | 1.0444       |

**Distillation study with *Juniperus excelsa* from Bulgaria, conducted on Jan 5 2018**

| <b>Timeframe, replicate</b> | <b>Species</b>           | <b>g oil</b> |
|-----------------------------|--------------------------|--------------|
| <i>0-5 min rep 1</i>        | <i>Juniperus excelsa</i> | 0.3552       |
| <i>0-5min rep 2</i>         | <i>Juniperus excelsa</i> | 0.2522       |
| <i>0-5min rep 3</i>         | <i>Juniperus excelsa</i> | 0.2717       |
| <i>5-10min rep1</i>         | <i>Juniperus excelsa</i> | 0.0683       |
| <i>5-10min rep2</i>         | <i>Juniperus excelsa</i> | 0.0665       |
| <i>5-10 min rep 3</i>       | <i>Juniperus excelsa</i> | 0.0747       |
| <i>10-20 min rep1</i>       | <i>Juniperus excelsa</i> | 0.0996       |
| <i>10-20 min rep2</i>       | <i>Juniperus excelsa</i> | 0.0709       |
| <i>10-20 min rep 3</i>      | <i>Juniperus excelsa</i> | 0.0728       |
| <i>20-40 min rep 1</i>      | <i>Juniperus excelsa</i> | 0.0149       |
| <i>20-40 min rep 2</i>      | <i>Juniperus excelsa</i> | 0.0992       |
| <i>20-40 min rep 3</i>      | <i>Juniperus excelsa</i> | 0.1249       |
| <i>40-80 min rep 1</i>      | <i>Juniperus excelsa</i> | 0.0000       |
| <i>40-80 min rep 2</i>      | <i>Juniperus excelsa</i> | 0.0000       |
| <i>40-80 min rep 3</i>      | <i>Juniperus excelsa</i> | 0.0000       |
| <i>80-160 min rep 1</i>     | <i>Juniperus excelsa</i> | 0.0000       |
| <i>80-160 min rep 2</i>     | <i>Juniperus excelsa</i> | 0.0000       |
| <i>80-160 min rep 3</i>     | <i>Juniperus excelsa</i> | 0.0318       |
| <i>160-240 min rep 1</i>    | <i>Juniperus excelsa</i> | 0.0163       |

|                           |                          |        |
|---------------------------|--------------------------|--------|
| <b>160-240 min rep 2</b>  | <i>Juniperus excelsa</i> | 0.0000 |
| <b>160-240 min rep 3</b>  | <i>Juniperus excelsa</i> | 0.0000 |
| <b>Controll 0-240 min</b> | <i>Juniperus excelsa</i> | 0.7180 |
| <b>Control 0-240 min</b>  | <i>Juniperus excelsa</i> | 1.1434 |

***Distillation study with Juniperus sabina collected in Bulgaria***

| <b>Replicate, timeframe in mi</b> | <b>Species</b>         | <b>g of oil</b> |
|-----------------------------------|------------------------|-----------------|
| rep1-time1; 0-3min                | <i>Junipers sabina</i> | 0.4625          |
| rep2-time1; 0-3min                | <i>Junipers sabina</i> | 0.7038          |
| rep3-time1; 0-3min                | <i>Junipers sabina</i> | 0.5532          |
| rep1-time2; 3-5min                | <i>Junipers sabina</i> | 0.3036          |
| rep2-time2; 3-5min                | <i>Junipers sabina</i> | 0.1110          |
| rep3-time2; 3-5min                | <i>Junipers sabina</i> | 0.1753          |
| rep1-time3; 5-10min               | <i>Junipers sabina</i> | 0.1710          |
| rep2-time3; 5-10min               | <i>Junipers sabina</i> | 0.2388          |
| rep3-time3; 5-10min               | <i>Junipers sabina</i> | 0.1878          |
| rep1-time4; 10-20min              | <i>Junipers sabina</i> | 0.1089          |
| rep2-time4; 10-20min              | <i>Junipers sabina</i> | 0.1188          |
| rep3-time4; 10-20min              | <i>Junipers sabina</i> | 0.1125          |
| rep1-time5; 20-40min              | <i>Junipers sabina</i> | 0.1430          |
| rep2-time5; 20-40min              | <i>Junipers sabina</i> | 0.1887          |
| rep3-time5; 20-40min              | <i>Junipers sabina</i> | 0.1033          |
| rep1-time6; 40-80min              | <i>Junipers sabina</i> | 0.2273          |
| rep2-time6; 40-80min              | <i>Junipers sabina</i> | 0.2248          |
| rep3-time6; 40-80min              | <i>Junipers sabina</i> | 0.2236          |
| <b>Control; 0-80min</b>           | <i>Junipers sabina</i> | 1.5801          |
| <b>Control; 0-80min</b>           | <i>Junipers sabina</i> | 1.7085          |
